# Supplementary material for: Discovery of Porcine microRNAs in Multiple Tissues by a Solexa Deep Sequencing Approach
Source: PLoS One. 2011 Jan 25;6(1):e16235. doi: 10.1371/journal.pone.0016235 (PMC3026822; doi:10.1371/journal.pone.0016235)
Supplement: Table S14 — Species of RNA and count number. (XLS) [file pone.0016235.s015.xls]

## Sheet: Sheet1
Table S14. Species of RNA and count number.
RNA class	Unique tag	%	Reads	%
rRNA	4954	1.24	27246	0.8
tRNA	2729	0.68	31762	0.94
sno/snRNA	2234	0.56	9775	0.29
other ncRNA	1494	0.37	13934	0.41
known miRNA	22542	5.64	2206969	65.12
candidate new miRNA	929	0.23	13534	0.4
candidate piRNA	66	0.02	7876	0.23
mRNA	26152	6.54	102489	3.02
unknown	338863	84.72	975633	28.79
Total	399963		3389218
