# Supplementary material for: Discovery of Porcine microRNAs in Multiple Tissues by a Solexa Deep Sequencing Approach
Source: PLoS One. 2011 Jan 25;6(1):e16235. doi: 10.1371/journal.pone.0016235 (PMC3026822; doi:10.1371/journal.pone.0016235)
Supplement: Table S17 — Probes for hybridization to microRNAs and stem-loop primers for RT-PCR. (XLS) [file pone.0016235.s018.xls]

## Sheet: Sheet1
Table S17. Probes for hybridization to microRNA and stem-loop primers for RT-PCR.
miRNA	ID	Sequence(5'-3')
ssc-miR-26a		5' AGCCTATCCTGGATTACTTGAA 3'	probe
ssc-miR-145		5' AGGGATTCCTGGGAAAACTGGAC 3'	probe
ssc-miR-191		5' CAGCTGCTTTTGGGATTCCGTTG 3'	probe
ssc-miR-192		5' GGCTGTCAATTCATAGGTCAG 3'	probe
ssc-miR-200a		5' AACATCGTTACCAGACAGTGTTA 3'	probe
ssc-miR-320		5' TCGCCCTCTCAACCCAGCTTTT 3'	probe
ssc-miR-375		5' CACGCGAGCCGAACGAACAAA 3'	probe
ssc-miR-423-5p		5' AAAGTCTCGCTCTCTGCCCCTCA 3'	probe
ssc-miR-new62		5' CCGTATCCGCAGGTTCCGCAT 3'	probe
	5S rRNA	5'-CGGTATTCCCAGGCGGTCT-3'	probe
ssc-miR-large1	loop-mir-large1	5' CTCAACTGGTGTCGTGGAGTCGGCAATTCAGTTGAGAAGCCAGT 3'	RT-loop primer
	RT-mir-large1	5' TCGGCAGGCCCCCCACTGCTAAA 3'	forward primer
ssc-miR-large12	loop-mir-large12	5' CTCAACTGGTGTCGTGGAGTCGGCAATTCAGTTGAGTCTGGCAT 3'	RT-loop primer
	RT-mir-large12	5' TCGGCAGGTGGAGCTGTAGC 3'	forward primer
ssc-miR-large13	loop-mir-large13	5' CTCAACTGGTGTCGTGGAGTCGGCAATTCAGTTGAGGAGAATCA 3'	RT-loop primer
	RT-mir-large13	5' TCGGCAGGGGCTCGTTGGTCTA 3'	forward primer
ssc-miR-large16	loop-mir-large16	5' CTCAACTGGTGTCGTGGAGTCGGCAATTCAGTTGAGACCAAATC 3'	RT-loop primer
	RT-mir-large16	5' CTGGTAGGTCCCTGGTGGTC 3'	forward primer
ssc-miR-large19	loop-mir-large19	5' CTCAACTGGTGTCGTGGAGTCGGCAATTCAGTTGAGTTGTTGTG 3'	RT-loop primer
	RT-mir-large19	5' GCAGGTCAATGCACAGGACAGCT 3'	forward primer
ssc-miR-large4	loop-mir-large4	5' CTCAACTGGTGTCGTGGAGTCGGCAATTCAGTTGAGTCTCAACA 3'	RT-loop primer
	RT-mir-large4	5' GGTTCTGCAGAAGTAAAGAGCCT 3'	forward primer
ssc-miR-new24	loop-mir-new24	5' CTCAACTGGTGTCGTGGAGTCGGCAATTCAGTTGAGCCGTCAAT 3'	RT-loop primer
	RT-mir-new24	5' TCGGCAGGACAGATGATGAACTT 3'	forward primer
ssc-miR-new27	loop-mir-new27	5' CTCAACTGGTGTCGTGGAGTCGGCAATTCAGTTGAGAGCCGGTC 3'	RT-loop primer
	RT-mir-new27	5' TCGGCAGGTCGACCGGACC 3'	forward primer
ssc-miR-new32	loop-mir-new32	5' CTCAACTGGTGTCGTGGAGTCGGCAATTCAGTTGAGTCTACCAC 3'	RT-loop primer
	RT-mir-new32	5' TCGGCAGGGGGGGTGTAGCT 3'	forward primer
ssc-miR-new4	loop-mir-new4	5' CTCAACTGGTGTCGTGGAGTCGGCAATTCAGTTGAGGCCGACAG 3'	RT-loop primer
	RT-mir-new4	5' TCGGCAGGTGGCACAGGGTC 3'	forward primer
ssc-miR-new47	loop-mir-new47	5' CTCAACTGGTGTCGTGGAGTCGGCAATTCAGTTGAGTCTCCCAT 3'	RT-loop primer
	RT-mir-new47	5' TCGGCAGGGTTAGTACTTGGATG 3'	forward primer
ssc-miR-new49	loop-mir-new49	5' CTCAACTGGTGTCGTGGAGTCGGCAATTCAGTTGAGTCTCCCAT 3'	RT-loop primer
	RT-mir-new49	5' GGCAGGTGGTTAGTACTTGGATG 3'	forward primer
ssc-miR-new50	loop-mir-new50	5' CTCAACTGGTGTCGTGGAGTCGGCAATTCAGTTGAGACTACTGG 3'	RT-loop primer
	RT-mir-new50	5' AGGTAGGCCCTGAATCAAGA 3'	forward primer
ssc-miR-new54	loop-mir-new54	5' CTCAACTGGTGTCGTGGAGTCGGCAATTCAGTTGAGCCGTTGCG 3'	RT-loop primer
	RT-mir-new54	5' TCGGCAGGGACCTCGTGGCGCAA 3'	forward primer
ssc-miR-new62	loop-mir-new62	5' CTCAACTGGTGTCGTGGAGTCGGCAATTCAGTTGAGCCGTATCC 3'	RT-loop primer
	RT-mir-new62	5' CTGGTAGGATGCGGAACCTGCGG 3'	forward primer
ssc-let-7a	loop-let-7a	5' CTCAACTGGTGTCGTGGAGTCGGCAATTCAGTTGAGAACTATAC 3'	RT-loop primer
	RT-let-7a	5' TCGGCAGGTGAGGTAGTAGG 3'	forward primer
ssc-miR-16	loop-mir-16	5' CTCAACTGGTGTCGTGGAGTCGGCAATTCAGTTGAGCGCCAATA 3'	RT-loop primer
	RT-mir-16	5' TCGGCAGGTAGCAGCACGTA 3'	forward primer
ssc-miR-20a	loop-mir-20a	5' CTCAACTGGTGTCGTGGAGTCGGCAATTCAGTTGAGCTACCTGC 3'	RT-loop primer
	RT-mir-20a	5' TCGGCAGGTAAAGTGCTTAT 3'	forward primer
ssc-miR-20b-5p	loop-mir-20b-5p	5' CTCAACTGGTGTCGTGGAGTCGGCAATTCAGTTGAGCTACCTGC 3'	RT-loop primer
	RT-mir-20b-5p	5' TCGGCAGGTAAAGTGCTTAT 3'	forward primer
ssc-miR-143	loop-mir-143	5' CTCAACTGGTGTCGTGGAGTCGGCAATTCAGTTGAGAGCTACAG 3'	RT-loop primer
	RT-mir-143	5' TCGGCAGGTGAGATGAAGCA 3'	forward primer
ssc-miR-192	loop-mir192	5' CTCAACTGGTGTCGTGGAGTCGGCAATTCAGTTGAGGGCTGTCA 3'	RT-loop primer
	RT-mir-192	5' TCGGCAGGCTGACCTATGAA 3'	forward primer
ssc-miR-133b	loop-mir-133b	5' CTCAACTGGTGTCGTGGAGTCGGCAATTCAGTTGAGAGCTGGTT 3'	RT-loop primer
	RT-mir-133b	5' TCGGCAGGTTTGGTCCCCTT 3'	forward primer
ssc-miR-223	loop-mir-223	5' CTCAACTGGTGTCGTGGAGTCGGCAATTCAGTTGAGTGGGGTAT 3'	RT-loop primer
	RT-mir-223	5' TCGGCAGGGTCAGTTTGTCA 3'	forward primer
	UR	5' TCAACTGGTGTCGTGGAGTCGGC 3'	Universal PCR reverse primer
